# Supplementary material for: Neuregulin 3 promotes excitatory synapse formation on hippocampal interneurons
Source: PubMed Central journal article supplement — EMBO J. 2018 Jul 26;37(17):e98858. doi: 10.15252/embj.201798858 (PMC6120667; doi:10.15252/embj.201798858), 2018-07-26
Supplement: EMBJ-37-e98858-s001.pdf [file EMBJ-37-e98858-s001.pdf]

## Expanded View Figures

### Figure EV1. Specificity of anti-Nrg3 and anti-ErbB4 antibodies, Nrg3/ErbB4 co-clustering on PV-negative neurons, and ErbB4 interneuron numbers in the hippocampus of Nrg3 mutant mice.

- A, B Hippocampus sections from wildtype (A, B) and *Nrg3*<sup>-/-</sup> mice (A', B'), age P35, were immunostained for Nrg3 (A, A') and ErbB4 (B, B'). Nrg3 is widely distributed throughout the neuropil with higher levels being associated with ErbB4<sup>+</sup> interneurons (A). Nrg3 immunostaining is abolished in Nrg3 mutant tissue (A'), ErbB4 levels are unchanged (B, B').
- C Western blot analysis of lysates from cortical tissue (brain) and cultured cortical neurons (culture). The anti-Nrg3 antibody detects a main band of about 95 kD (arrow) in lysates from wildtype (+/+) but not from Nrg3 mutant mice (-/-).
- D Hippocampus sections from wildtype (D) and heart-rescued ErbB4 mutant mice (D'), 2 months of age, were immunostained for ErbB4. ErbB4 immunostaining is detected in wildtype (D) but not ErbB4 mutant hippocampus (D').
- E Western blot analysis of lysates from cortical tissue. The anti-ErbB4 antibody detects a main band of 180 kD (black arrow) and a minor band of about 70 kD (gray arrow) in lysates from wildtype (+/+) but not from ErbB4 mutant mice (-/-).
- F Hippocampus section was immunostained against pro-CCK, ErbB4, and Nrg3; shown is the stratum pyramidale of CA1. CCK<sup>+</sup> interneurons express variable amounts of ErbB4 as indicated by white (high expression), gray (middle), and open arrowheads (no detectable ErbB4). Association of Nrg3 with soma or dendrites of CCK<sup>+</sup> interneurons is not detectable.
- G Section of the prefrontal cortex was immunostained against Nrg3, ErbB4, and parvalbumin (Parv). Nrg3 is co-localized with ErbB4 on soma and dendrites of PV-positive (filled arrow and arrowheads) and PV-negative neurons (open arrow and arrowheads).
- H Densities of ErbB4<sup>+</sup> interneurons in different layers of the hippocampal CA1 region are identical in adult wildtype and Nrg3 mutant mice at postnatal days 90–120; so, stratum oriens; sp, stratum pyramidale; sr, stratum radiatum; slm, stratum lacunosum-moleculare. Data represent mean ± SD of six biological replicates for each genotype. Two-way ANOVA with Bonferroni's multiple comparisons test was performed to assess statistical significance (ns = not significant). Scale bars: 500 μm (D'), 40 μm (F'), 50 μm (G').

Source data are available online for this figure.

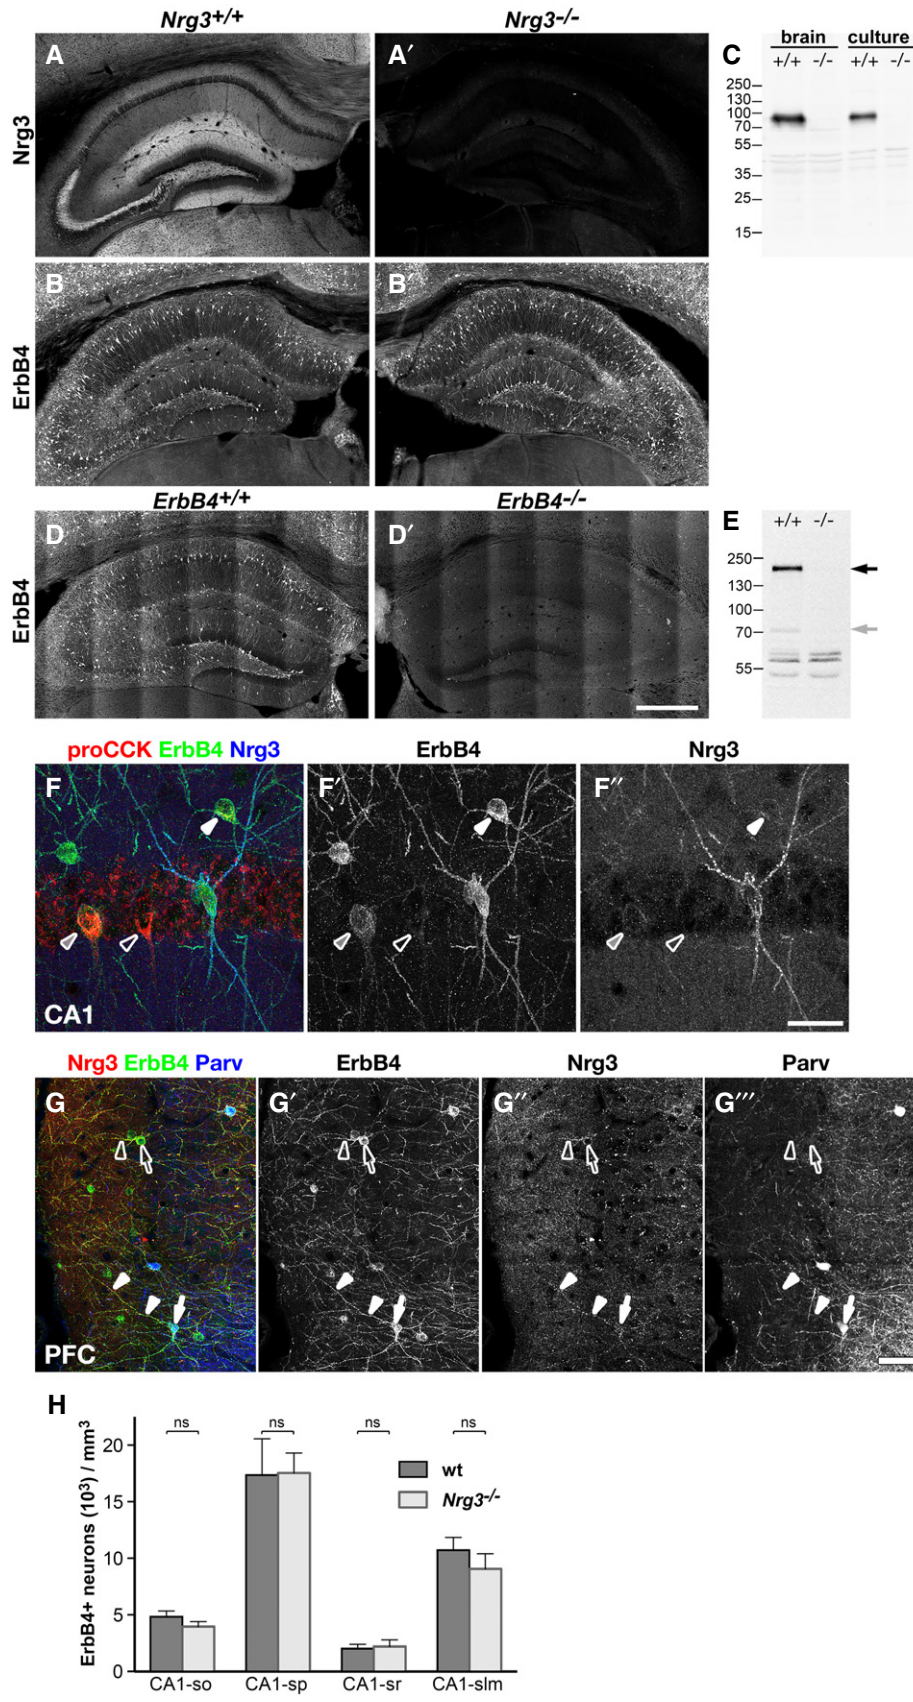

Figure EV1.

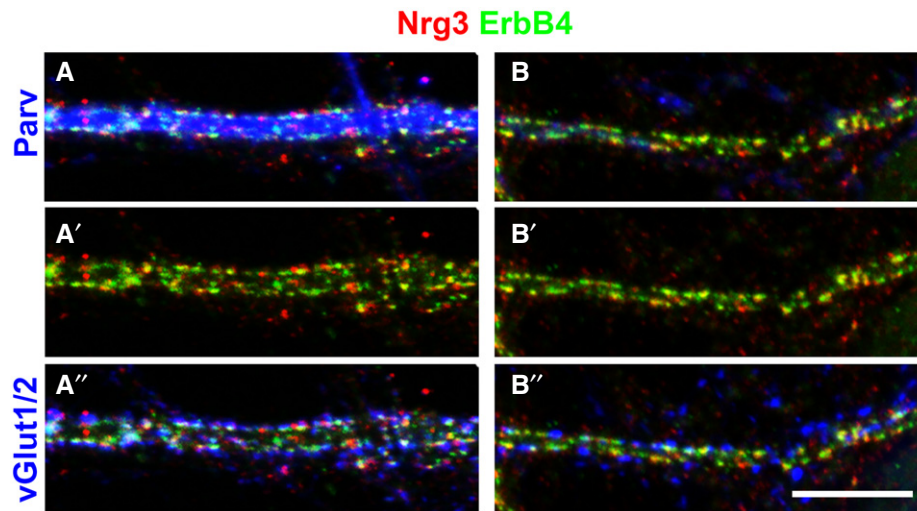

**Figure EV2. Nrg3/ErbB4 co-clustering in cultured PV-positive and PV-negative interneurons.**

A, B Neurons, cultured for 23 days, were co-immunostained with antibodies against Nrg3, ErbB4, parvalbumin (Parv), and vGlut1/2. Nrg3 and ErbB4 co-clustered on the dendrites of PV-positive (A) and PV-negative neurons (B). Note that (A–A'') and (B–B'') display false colors of the same images. Scale bar: 10  $\mu$ m (B'').

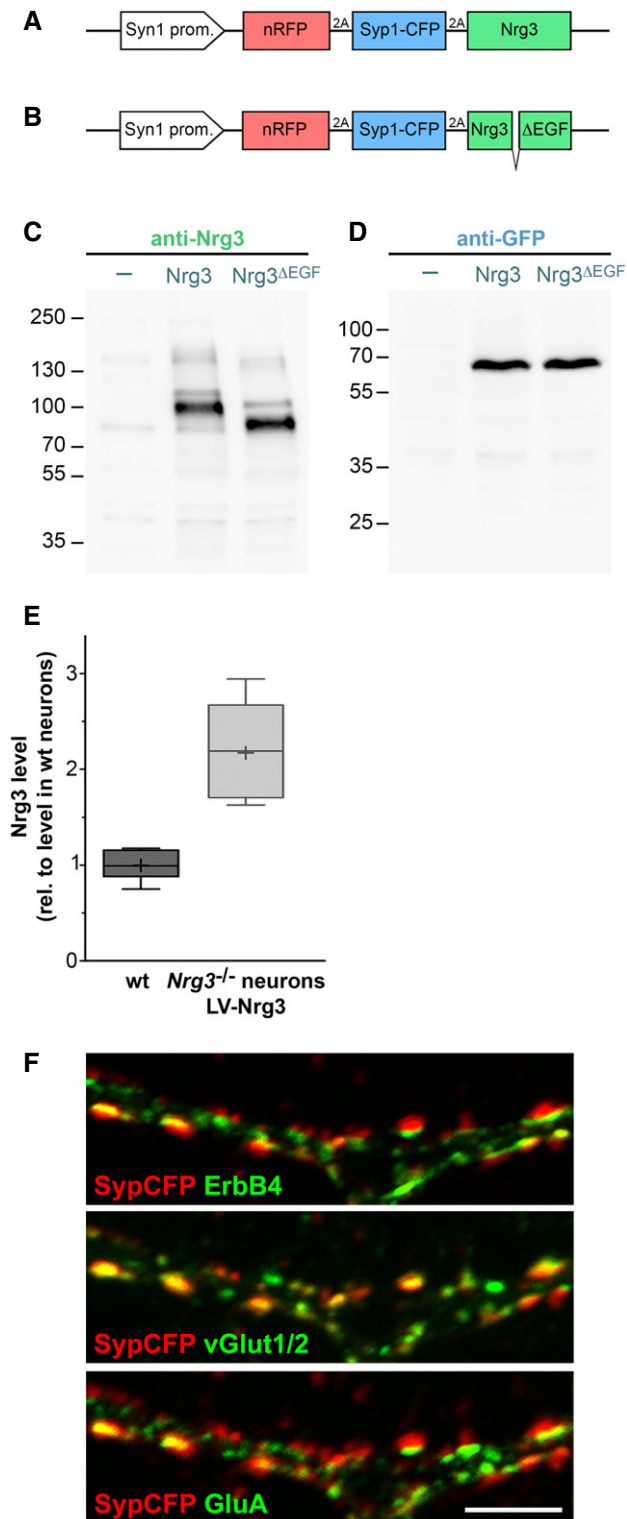

**Figure EV3. Lentiviral expression of Nrg3 and Nrg3ΔEGF.**

**A, B** Schematic display of the expression cassettes. The *synapsin 1* (Syn1) promoter is used for neuronal expression. Coding sequences for red fluorescence protein with a nuclear localization sequence (nRFP) and a fusion protein of synaptophysin and the cyan fluorescent protein (SypCFP) are followed by coding sequences for Nrg3 (A) or Nrg3ΔEGF (B). nRFP, SypCFP, and Nrg3/Nrg3ΔEGF coding sequences are separated by 2A sequences.

**C, D** Comparison of Nrg3 (C) and SypCFP (D) expression levels in *Nrg3*<sup>-/-</sup> neurons that were transduced with the Nrg3/SypCFP (middle lanes) and Nrg3ΔEGF/SypCFP lentiviruses (right lanes) at high titer, respectively, by Western blot analysis using antibodies against Nrg3 (C) and GFP (D). The lanes indicated by (-) show lysates from non-transduced neurons as negative control. Both lentiviruses express similar protein levels of Nrg3/Nrg3ΔEGF and SypCFP. Note that the main Nrg3 band in lysates from neurons transduced with the Nrg3ΔEGF/SypCFP lentivirus is smaller due to the deletion.

**E** Immunocytochemical comparison of endogenous and lentivirally expressed Nrg3 levels in vGlut1/2<sup>+</sup> excitatory synapses on ErbB4<sup>+</sup> neurons in cultures of wildtype (wt, left) or *Nrg3*<sup>-/-</sup> neurons transduced with the SypCFP/Nrg3 lentivirus (right). Fluorescence levels were normalized to the mean fluorescence level in wildtype neuron cultures. The Nrg3 lentivirus produced 2.17 ± 0.14-fold higher Nrg3 levels than wt neurons, and *n* = 13 and 11 neurons were analyzed in cultures from wildtype and Nrg3 mutants, respectively. Data are presented as box plots with Tukey's whiskers and outliers. Plus symbols denote the mean.

**F** Hippocampal *Nrg3*<sup>-/-</sup> neurons after transduction with lentivirus expressing SypCFP/Nrg3 were analyzed by immunocytochemistry using antibodies against CFP, ErbB4, vGlut1/2, and GluA. Panels show the same image and display SypCFP/ErbB4, SypCFP/vGlut1/2, and SypCFP/GluA signals, respectively. The images were assigned false colors for better visualization of the signals. SypCFP, ErbB4, vGlut1/2, and GluA co-localize in excitatory synapses. Scale bar: 5 μm.

Source data are available online for this figure.

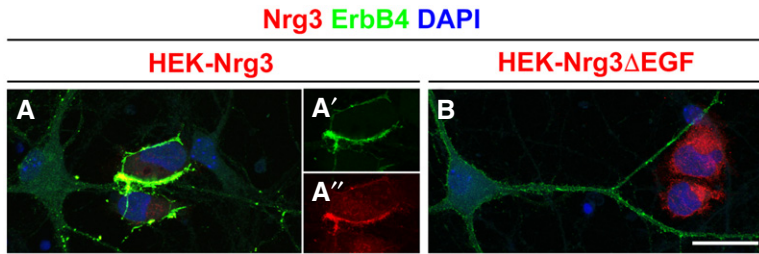

**Figure EV4. Interaction of Nrg3- and Nrg3ΔEGF-expressing HEK293 cells with ErbB4<sup>+</sup> neurons.**

A, B Neurons from Nrg3 mutant mice were co-cultured with (A) Nrg3- and (B) Nrg3ΔEGF-expressing HEK293 cells and immunostained for Nrg3/Nrg3ΔEGF (red) and ErbB4 (green). DAPI was used to counterstain nuclei (blue). Nrg3 and ErbB4 are highly enriched in contact areas between Nrg3-expressing HEK cells and ErbB4<sup>+</sup> interneurons (A); (A' and A'') show lower exposures of the immunofluorescence signals of ErbB4 and Nrg3. Note that Nrg3ΔEGF and ErbB4 remained evenly distributed when an ErbB4<sup>+</sup> interneuron was contacted by an Nrg3ΔEGF-expressing HEK cell (B). Scale bar: 25 μm

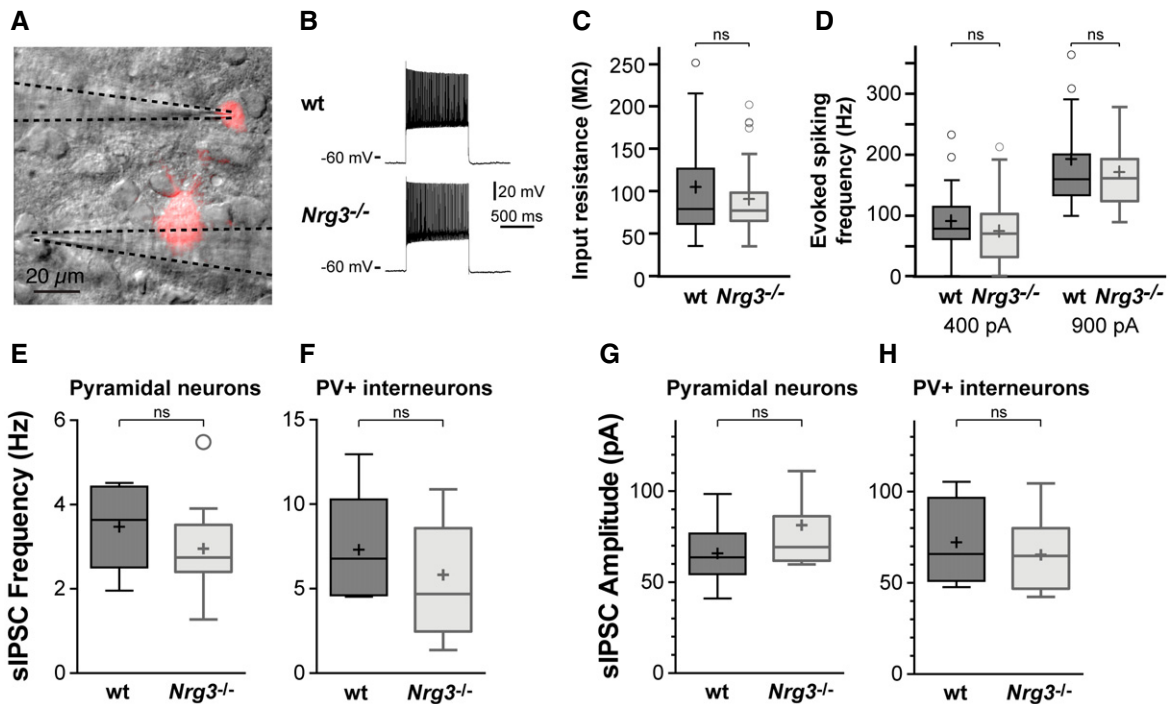

**Figure EV5. Electrophysiological properties of PV interneurons in the hippocampal CA1 region of wildtype and Nrg3 mutant mice.**

A Overlay of an infrared DIC image of the stratum pyramidale of the hippocampal CA1 with tdTomato fluorescence in a slice from a *Parv<sup>Cre/+</sup>;Ai14<sup>fllox/+</sup>* mouse. Dotted lines highlight the stimulation and recording electrodes.  
 B Example traces of the firing pattern of wildtype and *Nrg3<sup>-/-</sup>* PV interneurons. A current of 900 pA was injected for both patterns.  
 C Input resistance of PV interneurons in slices from wildtype and *Nrg3<sup>-/-</sup>* mice. Data from *n* = 59 (wt) and *n* = 55 (*Nrg3<sup>-/-</sup>*) neurons from 20 wt and 30 mutant mice are displayed. Mann–Whitney *U*-test (unpaired, two-tailed) was performed to assess statistical significance (ns, not significant).  
 D Evoked firing frequency in PV interneurons from wildtype and *Nrg3<sup>-/-</sup>* mice after current injection of 400 pA (left) and 900 pA (right). Data from *n* = 59 (400 pA, wt), *n* = 55 (400 pA, *Nrg3<sup>-/-</sup>*), *n* = 17 (900 pA, wt), and *n* = 41 (900 pA, *Nrg3<sup>-/-</sup>*) neurons are displayed. Mann–Whitney *U*-test (unpaired, two-tailed) was performed to assess statistical significance (ns, not significant). No differences were detected in input resistance and evoked firing frequency between wildtype and *Nrg3<sup>-/-</sup>* mice.  
 E–H sIPSC recordings of pyramidal (E, G) and PV neurons (F, H) in acute slices. sIPSC frequencies (E, F) and amplitudes (G, H) are shown. Data from *n* = 6 wildtype and *n* = 11 *Nrg3<sup>-/-</sup>* pyramidal neurons and from *n* = 4 wildtype and *n* = 7 *Nrg3<sup>-/-</sup>* PV interneurons were analyzed using an unpaired two-tailed *t*-test, and no significant (ns) differences were detected.

Data information: Data in (C–H) are presented as box plots with Tukey's whiskers and outliers. Plus symbols denote the mean.
