# Supplementary figures and images for: Neuregulin 3 promotes excitatory synapse formation on hippocampal interneurons
Source: PubMed Central journal article supplement — EMBO J. 2018 Jul 26;37(17):e98858. doi: 10.15252/embj.201798858 (PMC6120667; doi:10.15252/embj.201798858), 2018-07-26

Fig. 1D

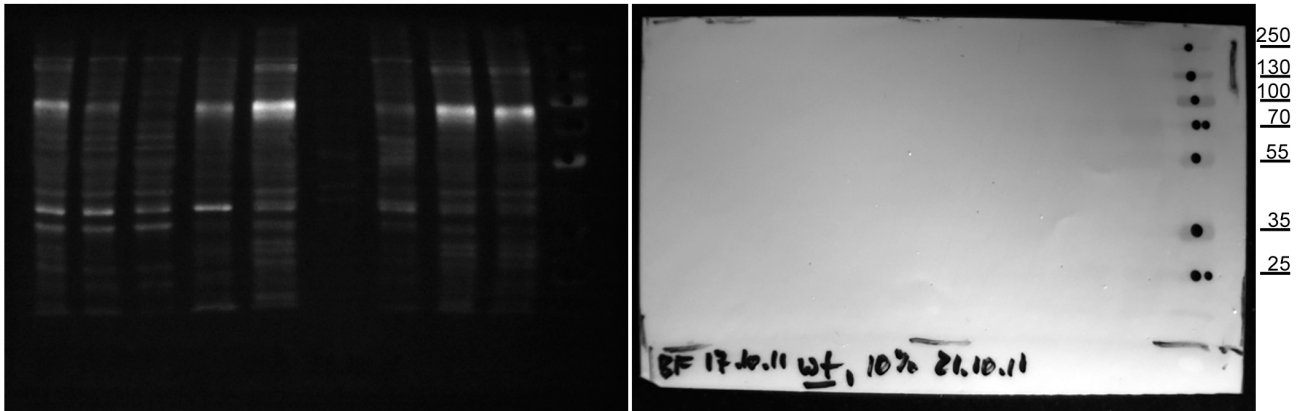

Supplement: EMBJ-37-e98858-s002.pdf [file EMBJ-37-e98858-s002.pdf]

**Fig. 4A**

IP: anti-ErbB4 WB: anti-pY

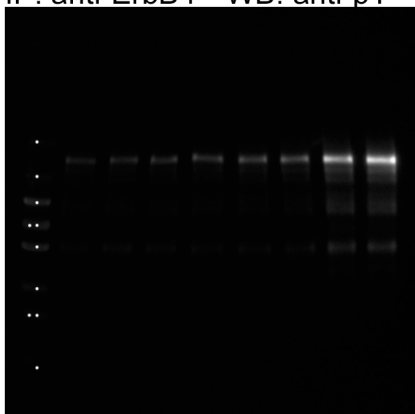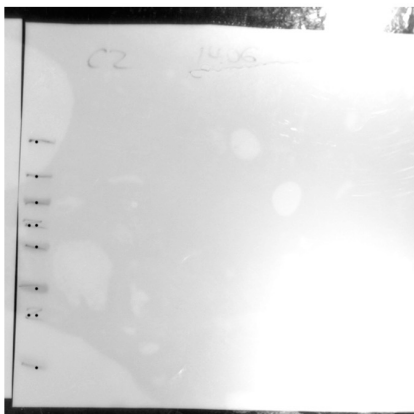

IP: anti-ErbB4 WB: anti-ErbB4

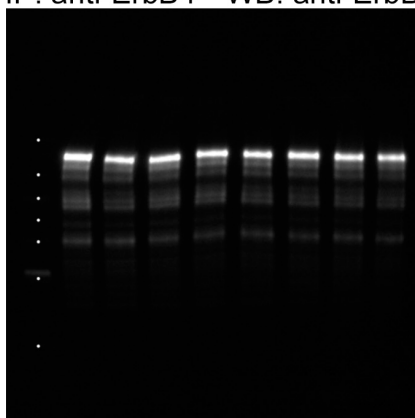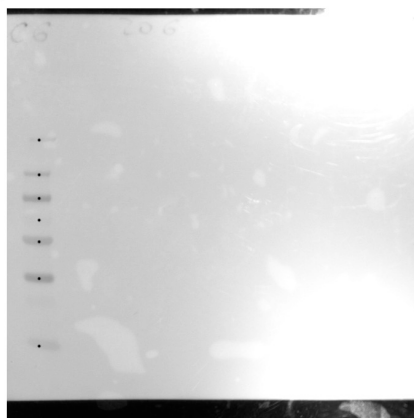

WB: anti-phospho-Erk1/2

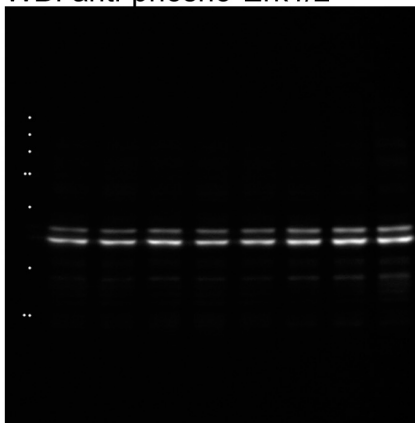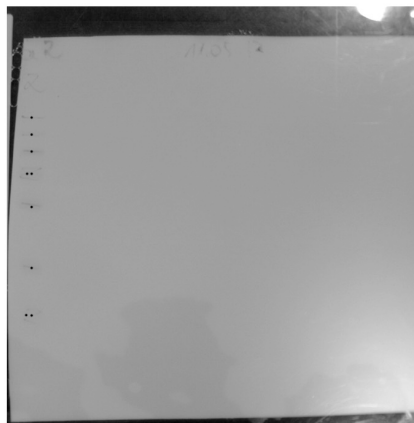

WB: anti-phospho-Akt

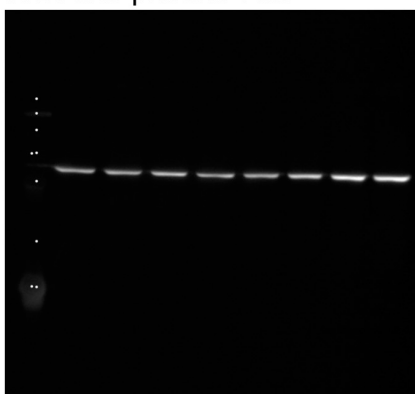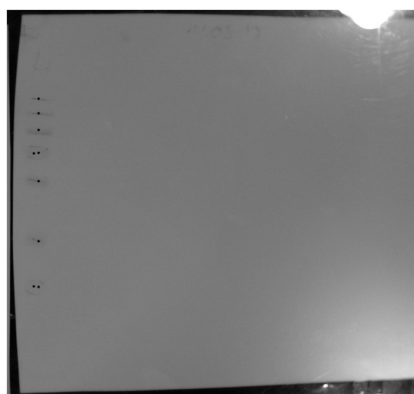

Supplement: EMBJ-37-e98858-s003.pdf [file EMBJ-37-e98858-s003.pdf]
